# Supplementary material for: The future of MEG: Improved task-related responses using optically-pumped magnetometers compared to a conventional system
Source: Research Square preprint supplement (doi:10.21203/rs.3.rs-3263385/v1), 2023-10-06
Supplement: Supplementary file 1 [file fe2b2de7bab64790895b5682.docx]

**Supplemental Tables**

**OPM data cryo-compatible participants**

**Supplemental Table 1:** Percentage overlap of significant voxels with AAL regions

| **Percentage** | **AAL Regions** |
| --- | --- |
| 6.20 | Temporal_Mid_L |
| 5.82 | Temporal_Inf_R |
| 5.60 | Temporal_Inf_L |
| 5.12 | Temporal_Mid_R |
| 4.13 | Temporal_Sup_R |
| 3.64 | Frontal_Sup_Medial_L |
| 3.24 | Fusiform_R |
| 2.97 | Frontal_Inf_Orb_L |
| 2.50 | Cingulum_Ant_L |
| 2.45 | Frontal_Sup_L |
| 2.41 | Frontal_Mid_L |
| 2.39 | Cingulum_Ant_R |
| 2.39 | Occipital_Mid_L |
| 2.21 | Insula_R |
| 2.20 | Precentral_L |
| 2.18 | Fusiform_L |
| 2.15 | Frontal_Sup_Medial_R |
| 2.00 | Rolandic_Oper_R |
| 1.90 | Insula_L |
| 1.79 | Frontal_Sup_Orb_L |
| 1.68 | ParaHippocampal_R |
| 1.61 | Temporal_Pole_Sup_L |
| 1.59 | Rectus_L |
| 1.54 | Putamen_R |
| 1.54 | Hippocampus_R |
| 1.52 | Caudate_L |
| 1.45 | Frontal_Med_Orb_R |
| 1.44 | Temporal_Pole_Sup_R |
| 1.40 | Rectus_R |
| 1.33 | Frontal_Med_Orb_L |
| 1.31 | Putamen_L |
| 1.29 | ParaHippocampal_L |
| 1.26 | Temporal_Pole_Mid_L |
| 1.22 | Frontal_Sup_Orb_R |
| 1.16 | Caudate_R |
| 1.10 | Frontal_Inf_Oper_R |
| 1.06 | Temporal_Pole_Mid_R |
| 1.06 | Postcentral_R |
| 0.96 | Frontal_Inf_Tri_L |
| 0.95 | Occipital_Inf_L |
| 0.90 | Frontal_Mid_Orb_L |
| 0.83 | Frontal_Sup_R |
| 0.77 | Hippocampus_L |
| 0.73 | Thalamus_R |
| 0.53 | Postcentral_L |
| 0.53 | Olfactory_L |
| 0.47 | Olfactory_R |
| 0.45 | Pallidum_L |
| 0.44 | Precentral_R |
| 0.42 | Heschl_R |
| 0.41 | Amygdala_L |
| 0.41 | Amygdala_R |
| 0.40 | Pallidum_R |
| 0.38 | Cingulum_Mid_R |
| 0.37 | Thalamus_L |
| 0.29 | Lingual_L |
| 0.27 | Frontal_Inf_Tri_R |
| 0.23 | Frontal_Inf_Orb_R |
| 0.20 | Frontal_Mid_Orb_R |
| 0.18 | Supp_Motor_Area_L |
| 0.18 | Angular_L |
| 0.18 | Occipital_Inf_R |
| 0.12 | Cingulum_Mid_L |
| 0.11 | Lingual_R |
| 0.08 | SupraMarginal_R |
| 0.08 | SupraMarginal_L |
| 0.07 | Paracentral_Lobule_L |
| 0.06 | Temporal_Sup_L |
| 0.05 | Angular_R |
| 0.04 | Frontal_Inf_Oper_L |
| 0.04 | Parietal_Inf_L |
| 0.01 | Frontal_Mid_R |

.

**Cryogenic MEG data cryo-compatible participants**

**Supplemental Table 2:** Percentage overlap of significant voxels with AAL regions

| **Percentage** | **AAL Regions** |
| --- | --- |
| 13.17 | Postcentral_L |
| 9.21 | Temporal_Inf_R |
| 6.79 | Precentral_L |
| 5.72 | Insula_L |
| 5.35 | Temporal_Sup_L |
| 5.23 | Rolandic_Oper_L |
| 4.74 | Temporal_Mid_R |
| 4.3 | SupraMarginal_L |
| 4 | Supp_Motor_Area_L |
| 3.84 | Temporal_Mid_L |
| 3.54 | Occipital_Inf_L |
| 3.31 | Occipital_Mid_L |
| 3.26 | Cingulum_Ant_L |
| 3.17 | Parietal_Inf_L |
| 3.02 | Frontal_Inf_Oper_L |
| 2.91 | Temporal_Inf_L |
| 2.74 | Fusiform_L |
| 2.56 | Frontal_Inf_Orb_L |
| 2.54 | Cingulum_Mid_L |
| 2.23 | Fusiform_R |
| 1.82 | Temporal_Pole_Sup_L |
| 1.76 | Frontal_Inf_Tri_L |
| 1 | Occipital_Inf_R |
| 0.95 | Frontal_Sup_L |
| 0.59 | Heschl_L |
| 0.52 | Temporal_Pole_Mid_L |
| 0.46 | Frontal_Sup_Medial_L |
| 0.39 | Occipital_Mid_R |
| 0.31 | Putamen_L |
| 0.2 | Lingual_L |
| 0.17 | Cingulum_Ant_R |
| 0.11 | Supp_Motor_Area_R |
| 0.05 | Lingual_R |
| 0.02 | ParaHippocampal_L |
| 0.01 | Olfactory_L |
